# Supplementary material
Source: publisher figshare collection journal article supplement (https://tandf.figshare.com/ndownloader/files/17132291)

# Pre-Neogene basement unconformity map of the Croatian part of the Pannonian Basin

Marko Cvetković<sup>1</sup>, Bojan Matoš<sup>1</sup>, David Rukavina<sup>1</sup>, Iva Kolenković Močilac<sup>1</sup>, Bruno Saftić<sup>1</sup>, Tomislav Baketarić<sup>2</sup>, Marija Baketarić<sup>3</sup>, Ivor Vuić<sup>4</sup>, Andrej Stopar<sup>5</sup>, Anja Jarić<sup>6</sup>, Tomislav Paškov<sup>7</sup>

© Journal of Maps 2019

<sup>1</sup>University of Zagreb, Faculty of Mining, Geology and Petroleum Engineering, Pierottijeva 6, 10,000 Zagreb, Croatia  
<sup>2</sup>INA Plc. Av. Većeslava Holjevca 10, 10,000 Zagreb  
<sup>3</sup>Mikulčić 78a, 10,000 Zagreb, Croatia  
<sup>4</sup>Babonićeva 50, 10,000 Zagreb, Croatia  
<sup>5</sup>Pješćana Uvala 7/33, 52,100 Pula, Croatia  
<sup>6</sup>Croatian Natural History Museum, Demetrova 1, 10,000 Zagreb, Croatia  
<sup>7</sup>V. Lisinskog 1, 22,211 Vodice, Croatia

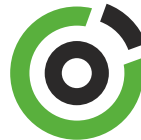

RGNF

Projection: GSC WGS 1984 (UTM 33N)

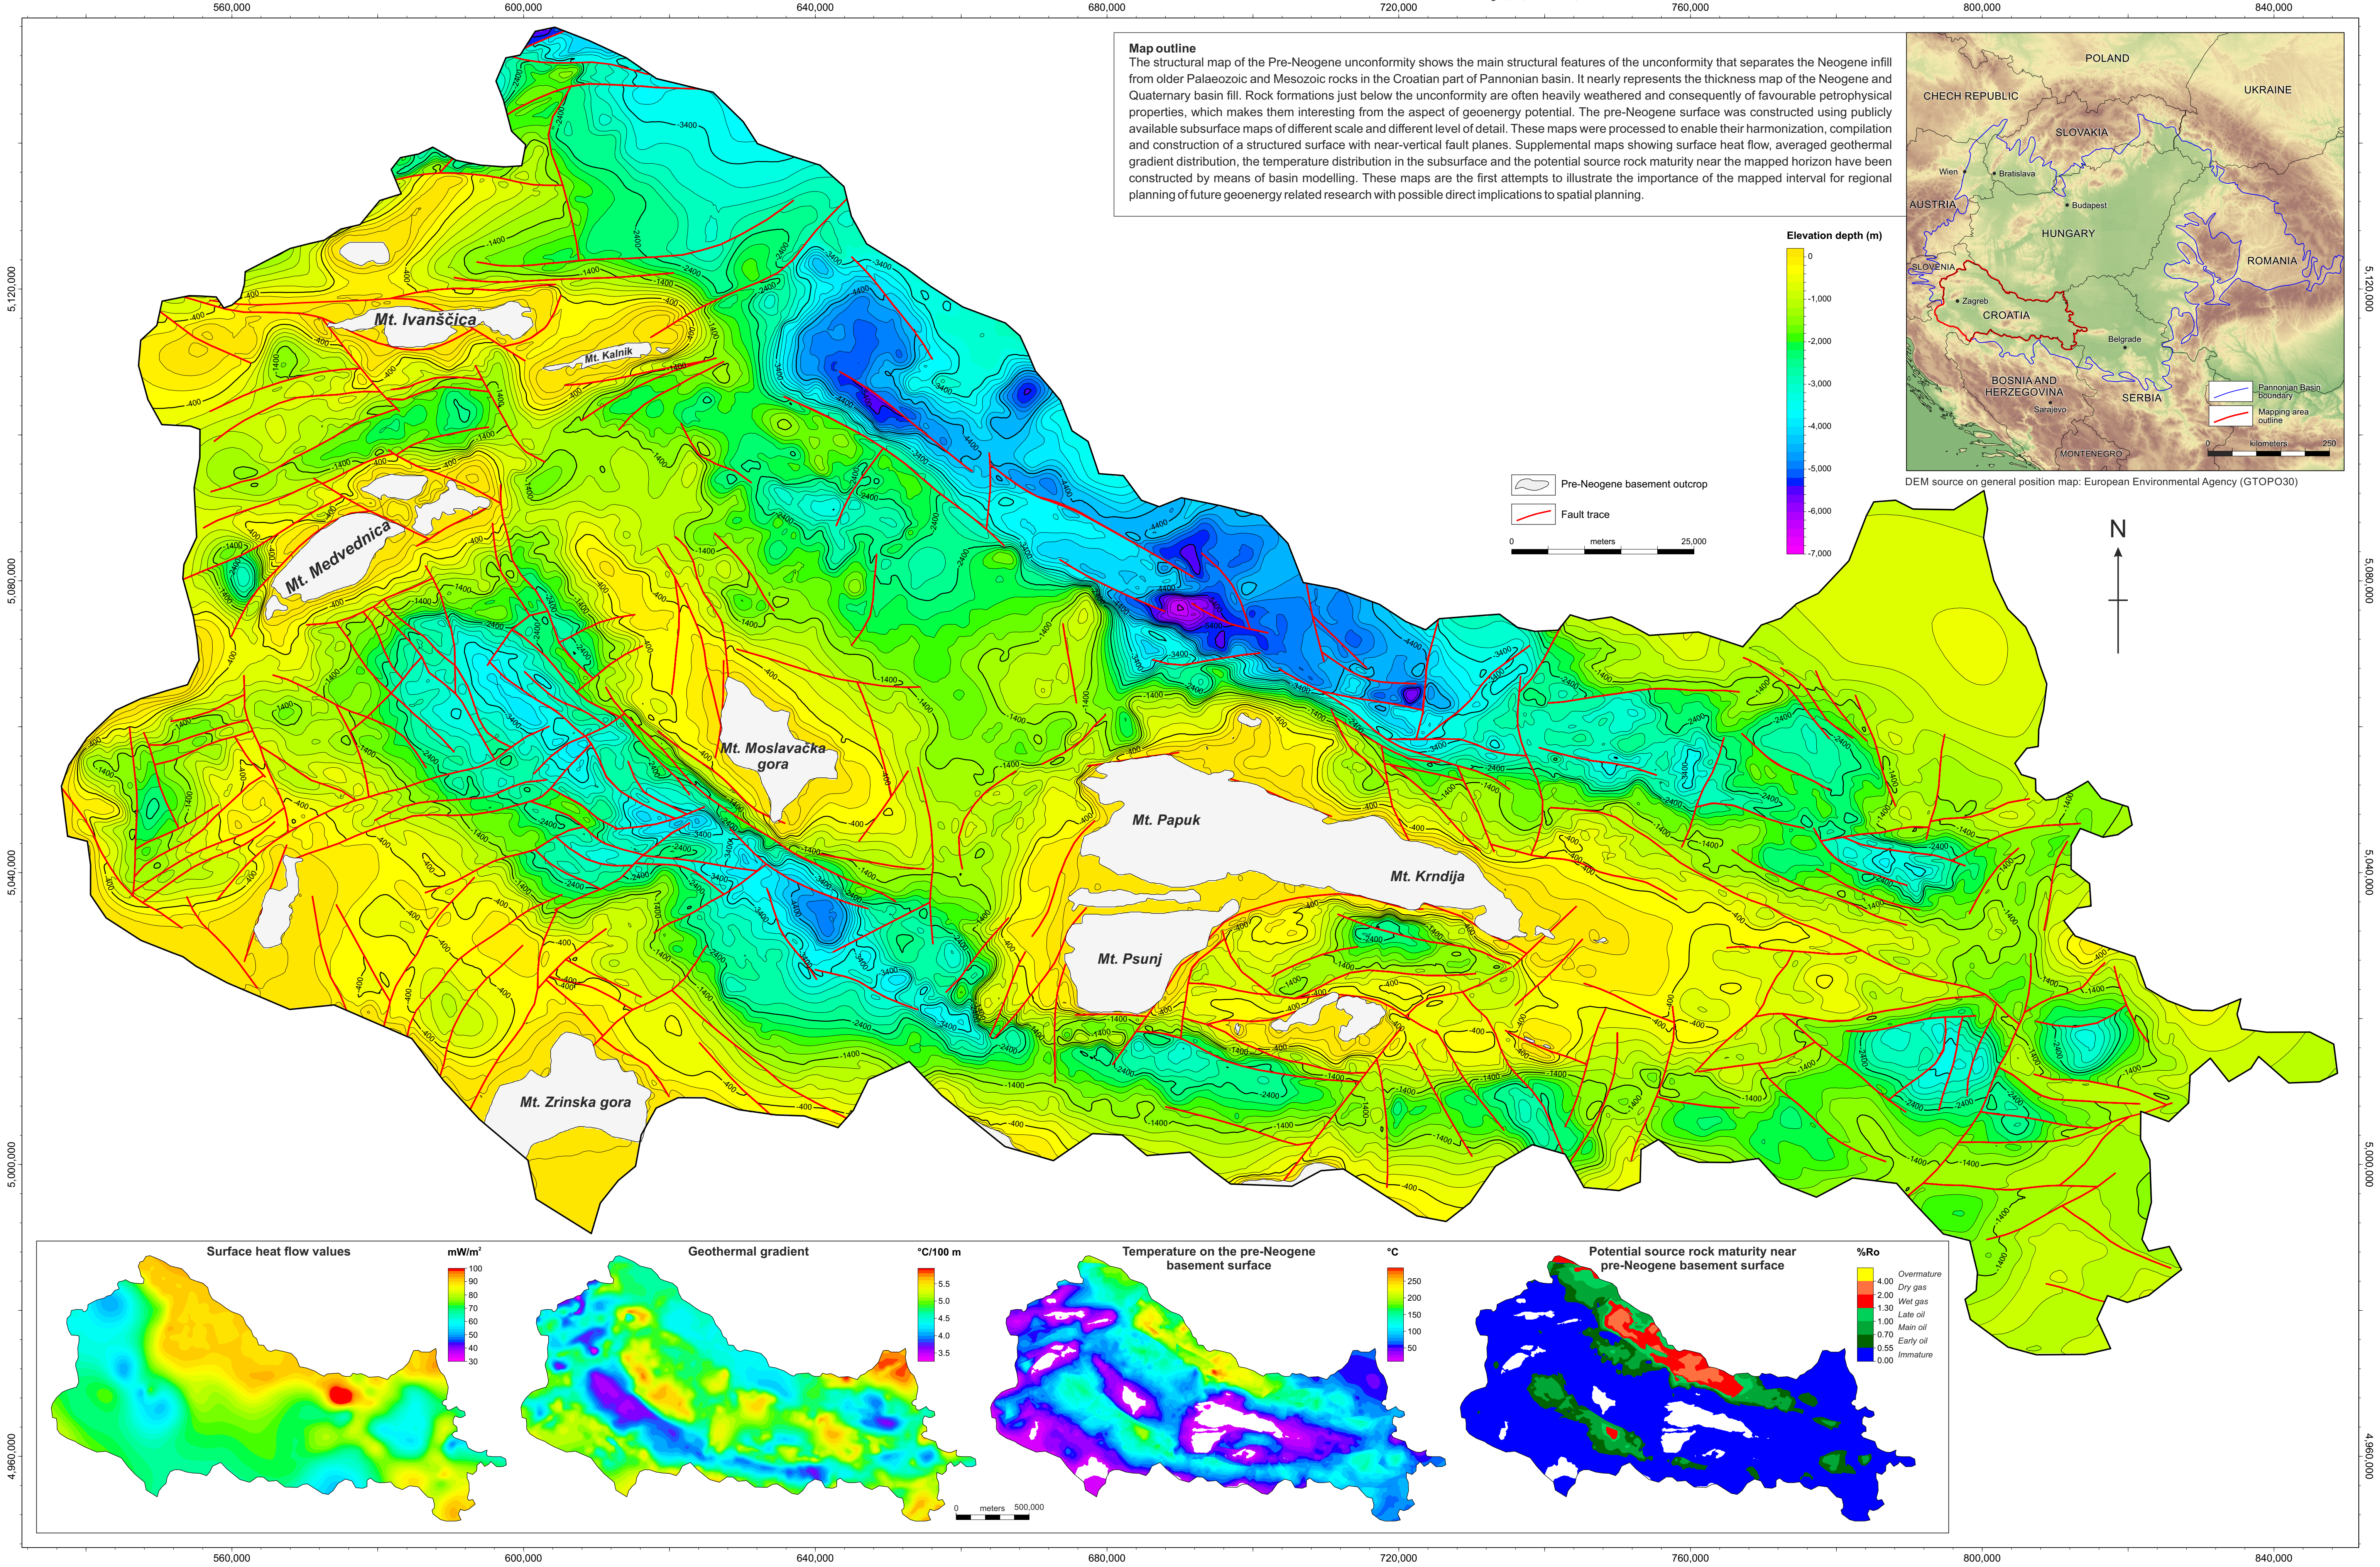

Supplement: Supplementary file 1 [file 17132291]
